# Supplementary material for: Multi-phase Biogeochemical Model for Microbially Induced Desaturation and Precipitation
Source: Copernicus journal article supplement (doi:10.5194/egusphere-2022-1419), 2022-12-16
Supplement: Supplementary file 1 [file egusphere-2022-1419-supplement.pdf]

1 **APPENDIX A**

2 **COMPARISONS OF PROPOSED AND EXISTING MIDP MODELS**

3 Table A1. Comparison of Existing MIDP Models and the Presented Next Generation MIDP  
4 Model

| Modeling Component                                                              | O'Donnell et al. (2019) | Pham (2017) | This Model |
|---------------------------------------------------------------------------------|-------------------------|-------------|------------|
| Baseline Substrate Recipe Estimation for Desaturation                           |                         | X           | X          |
| Baseline Substrate Recipe Estimation for Precipitation                          |                         |             | X          |
| Complex Acid-base Equilibria                                                    |                         | X           | X          |
| Denitrifier Growth and Decay                                                    | X                       | X           | X          |
| Other Microbe Growth and Decay                                                  |                         |             | X          |
| Microbial Electron Donor Competition                                            |                         |             | X          |
| Nitrous Acid Inhibition                                                         | X                       | X           | X          |
| Alternative MIDP Inhibition                                                     |                         |             | X          |
| Other Microbial Inhibition                                                      |                         |             | X          |
| pH Calculation                                                                  | X                       | X           | X          |
| CaCO <sub>3</sub> Mineral Formation                                             | X                       | X           | X          |
| Other Mineral Equilibrium                                                       |                         |             | X          |
| Mineral Precipitation and Dissolution Kinetics                                  |                         |             | X          |
| N <sub>2</sub> Phase-transfer Kinetics                                          |                         | X           | X          |
| Other Gas Production and Phase-transfer Kinetics                                |                         |             | X          |
| Ground Improvement Metric Calculations (i.e., desaturation and % precipitation) |                         |             | X          |

5

6 **CONSTANTS USED IN BIOGEOCHEMICAL MODEL**

7 Table A2. Constants used during modeling; these do not include constants found within the  
8 ORCHESTRA database for acid-base speciation (Meeussen, 2003), nor those dependent on  
9 electron donor and acceptor (e.g.,  $K_a$  and  $K_d$ ).

| Parameter                                                                                                         | Value                                            | Reference                  |
|-------------------------------------------------------------------------------------------------------------------|--------------------------------------------------|----------------------------|
| $\Delta G_c^{0'}$ (kJ e <sup>-</sup> eq <sup>-1</sup> ): free energy of the carbon source                         | Acetate: 27.4<br>Glucose: 41.0<br>Molasses: 41.0 | (Rittmann & McCarty, 2020) |
| $\Delta G_{pc}$ (kJ e <sup>-</sup> eq <sup>-1</sup> ): free energy to convert pyruvate carbon to cellular carbon, | Nitrate: 14.1<br>Ammonium: 19.5                  | (Rittmann & McCarty, 2020) |

|                                                                                                                              |                                                                        |                                                                |
|------------------------------------------------------------------------------------------------------------------------------|------------------------------------------------------------------------|----------------------------------------------------------------|
| depending on the nitrogen source                                                                                             |                                                                        |                                                                |
| $\Delta G_a^{0'}$ (kJ e <sup>-</sup> eq <sup>-1</sup> ): free energy required to reduce an electron acceptor                 | Nitrate: -41.65<br>Nitrite: -92.56<br>Sulfate: 20.85<br>Oxygen: -78.72 | (Rittmann & McCarty, 2020)                                     |
| $\Delta G_d^{0'}$ (kJ e <sup>-</sup> eq <sup>-1</sup> ): free energy released to oxidize an electron donor                   | Acetate: 27.4<br>Glucose: 41.0<br>Molasses: 41.0                       | (Rittmann & McCarty, 2020)                                     |
| $\hat{q}_e$ : maximum flow of electrons (e-equivalent g <sup>-1</sup> biomass d <sup>-1</sup> )                              | 1.0                                                                    | (Rittmann & McCarty, 2020)                                     |
| $RM_A$ : (g Chemical Oxygen Demand (donor e <sup>-</sup> equivalent) <sup>-1</sup> )                                         | 8                                                                      | (Rittmann & McCarty, 2020)                                     |
| $RM_B$ : (mol donor g <sup>-1</sup> Chemical Oxygen Demand)                                                                  | Acetate: 84<br>Glucose: 192<br>Molasses: 192                           | Calculated from half reactions (Rittmann & McCarty, 2020)      |
| $e^-_d$ (mol electron donor (donor e <sup>-</sup> equivalent) <sup>-1</sup> ) is the amount of donor per electron equivalent | Acetate: 0.13<br>Glucose: 0.04<br>Molasses 0.04                        | Calculated from $RM_A$ , $RM_B$ , and $\hat{q}_e$              |
| $\varepsilon$ : energy transfer efficiency term                                                                              | 0.6                                                                    | (Rittmann & McCarty, 2020)                                     |
| $n$ : considers energy efficiency due to thermodynamics, depending on electron donor                                         | Acetate: 1<br>Glucose: 1<br>Molasses: 1                                | (Rittmann & McCarty, 2020)                                     |
| $X_a$ (mmol biomass L <sup>-1</sup> ): Active biomass concentration                                                          | Denitrifiers: 0.5<br>Sulfate Reducers: 0.25                            |                                                                |
| $k_{LA}$ (d <sup>-1</sup> ): gas mass transfer constant                                                                      | 0.5                                                                    | (Yongsiri et al., 2004)                                        |
| $K_{sp(CaCO_3)}$ : speciation constant for calcium carbonate                                                                 | 10 <sup>-8.3</sup>                                                     |                                                                |
| $R$ (L atm K <sup>-1</sup> mol <sup>-1</sup> ): universal gas constant                                                       | 0.082057                                                               |                                                                |
| $T$ (K): temperature                                                                                                         | 298                                                                    |                                                                |
| $K_H$ (L <sub>aq</sub> atm mol <sup>-1</sup> ): Henry's Law coefficients                                                     | N <sub>2</sub> : 1600<br>CO <sub>2</sub> : 29<br>H <sub>2</sub> S: 10  |                                                                |
| $e$ (L <sub>pore</sub> L <sub>soil</sub> <sup>-1</sup> ): void ratio                                                         | 0.64                                                                   | Within a value of acceptable ranges (Christopher et al., 2006) |
| $ka$ (L d <sup>-1</sup> ): combined coefficient considering a constant mass transfer and the average crystal surface area    | 100                                                                    | Within a value of acceptable ranges (Rittmann et al., 2003)    |

|                                                                       |      |                                                                |
|-----------------------------------------------------------------------|------|----------------------------------------------------------------|
| $\rho_{soil}$ (g soil L <sub>soil</sub> <sup>-1</sup> ): soil density | 1950 | Within a value of acceptable ranges (Christopher et al., 2006) |
|-----------------------------------------------------------------------|------|----------------------------------------------------------------|

10

11

## DERIVATIONS OF IMPORTANT PARAMETERS

12 The value of  $\hat{q}$  (mol electron donor mol<sup>-1</sup> biomass d<sup>-1</sup>) was estimated using Eq. A1  
 13 (Rittmann & McCarty, 2020).

$$\hat{q} = \frac{\hat{q}_e e_d^-}{f_e^0} \quad \text{Eq. A1}$$

14 where  $\hat{q}_e$  is the maximum electron flow from the donor to the acceptor for energy production  
 15 (acceptor e<sup>-</sup> eq mol<sup>-1</sup> biomass d<sup>-1</sup>),  $f_e^0$  is the fraction of donor electrons used for energy  
 16 production (acceptor e<sup>-</sup> eq (donor e<sup>-</sup> eq)<sup>-1</sup>), and  $e_d^-$  is the amount of donor per electron equivalent  
 17 (mol electron donor (donor e<sup>-</sup> equivalent)<sup>-1</sup>). The molecular formula for biomass was  
 18 CH<sub>1.8</sub>O<sub>0.5</sub>N<sub>0.2</sub>, and the resulting  $\hat{q}_e$  is 24.6 e<sup>-</sup> eq mol<sup>-1</sup> biomass d<sup>-1</sup>. For acetate,  $e_d^-$  is 0.13 electron  
 19 donor e<sup>-</sup> equivalent<sup>-1</sup>.  $f_e^0$  was determined using Eq. A2 (Rittmann & McCarty, 2020).

$$f_e^0 = 1 - \frac{1}{-\left(\frac{30.09 - \Delta G_c^{0'}}{\varepsilon^n} + \frac{\Delta G_{pc}}{\varepsilon}\right) + 1} \quad \text{Eq. A2}$$

20 where 30.09 is the amount of energy required to form the representative intermediate during  
 21 synthesis, acetate (acetyl-CoA) (kJ e<sup>-</sup> eq),  $\Delta G_c^{0'}$  is the energy required to convert the carbon  
 22 source to forms useful in synthesis (in this case, the carbon source is also the electron donor) (kJ  
 23 e<sup>-</sup> eq<sup>-1</sup>),  $\varepsilon$  is the energy transfer efficiency term ( $\varepsilon = 0.6$ ),  $n$  is used to consider energy efficiency  
 24 when the reaction is thermodynamically positive ( $n = -1$ ) or negative ( $n = 1$ ),  $\Delta G_{pc}$  is the energy

25 required to convert the carbon source (acetate in this case) to carbon used for biomass synthesis,  
 26 depending on the nitrogen source ( $\text{kJ e}^- \text{eq}^{-1}$ ), and  $\Delta G_r$  is the energy released during each redox  
 27 reaction ( $\text{kJ e}^- \text{eq}^{-1}$ ).  $\Delta G_{pc}$  was calculated to consider either nitrate or ammonium as the nitrogen  
 28 source (Rittmann & McCarty, 2020). All free-energy parameters, listed in Table A3, were found  
 29 in Rittmann and McCarty (2020).

30 Table A3. Bacterial Energetic Parameters for all Compounds Considered in the Model at pH = 7.

| Parameter                                                                                                     | Value ( $\text{kJ e}^- \text{eq}^{-1}$ )                               |
|---------------------------------------------------------------------------------------------------------------|------------------------------------------------------------------------|
| $\Delta G_c^0$ : free energy of the carbon source                                                             | Acetate: 27.4<br>Glucose: 41.0<br>Molasses: 41.0                       |
| $\Delta G_{pc}$ : free energy to convert pyruvate carbon to cellular carbon, depending on the nitrogen source | Nitrate: 14.1<br>Ammonium: 19.5                                        |
| $\Delta G_a^0$ : free energy required to reduce an electron acceptor                                          | Nitrate: -41.65<br>Nitrite: -92.56<br>Sulfate: 20.85<br>Oxygen: -78.72 |
| $\Delta G_d^0$ : free energy released to oxidize an electron donor                                            | Acetate: 27.4<br>Glucose: 41.0<br>Molasses: 41.0                       |

31

32 The model considers biogeochemical reactions that involve alternative electron acceptors and the  
 33 presence of alternative minerals and metals (i.e., iron, sulfate). Table 2 in the main manuscript  
 34 details the microbial energetic values used to calculate the expected substrate utilization and  
 35 maximum specific growth rates ( $\mu_{\max}$ ). Within the model, two different nitrogen sources are  
 36 considered: nitrate and ammonium. Ammonium as a nitrogen source is more  
 37 thermodynamically favorable, as shown in Table A3. Therefore, more electron equivalents of  
 38 nitrate are needed to form biomass than ammonium. The thermodynamic favorability of  
 39 ammonium over nitrate is reflected in the fraction of electrons going to energy generation ( $f_e^0$ )  
 40 and fraction of electrons going to biomass synthesis ( $f_s^0$ ) values (Table A4).

41 Table A4. Microbial Energetics Expected During MIDP, Considering Acetate as the Electron  
 42 Donor and Natural Electron Acceptors

| Electron Acceptor | Nitrogen Source | $G_r$ ( $kJ e^- eq^{-1}$ ) | $f_e^0$ | $f_s^0$ | $\hat{q}$ ( $mol e^- donor mol^{-1} biomass d^{-1}$ ) |
|-------------------|-----------------|----------------------------|---------|---------|-------------------------------------------------------|
| Nitrate           | Nitrate         | -69.05                     | 0.40    | 0.60    | 8.12                                                  |
| Nitrite           | Nitrate         | -119.96                    | 0.28    | 0.72    | 11.69                                                 |
| Sulfate           | Nitrate         | -6.55                      | 0.88    | 0.12    | 3.74                                                  |
| Nitrate           | Ammonium        | -69.05                     | 0.47    | 0.53    | 6.95                                                  |
| Nitrite           | Ammonium        | -119.96                    | 0.34    | 0.66    | 9.65                                                  |
| Sulfate           | Ammonium        | -6.55                      | 0.90    | 0.10    | 3.63                                                  |

43

44

### pH Determination

45 The steps for how pH was determined within the model is as follows (Meeussen, 2003; van  
 46 Turnhout et al., 2016), using  $H_2CO_3$ ,  $HCO_3^-$ ,  $CO_3^{2-}$ ,  $H^+$ , and  $OH^-$  to illustrate the process.

47 1. At  $t = 0$ , the program loads the input concentrations file, which includes the concentration  
 48 of all total species (e.g.,  $H_2CO_3$  representing DIC,  $H^+$ ) and the stoichiometry for  
 49 metabolic and kinetic reactions: e.g.,

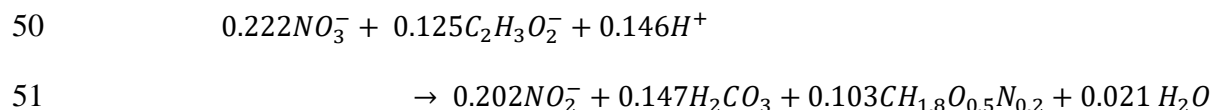

52 2. Ordinary differential equations are used to determine compound consumption and  
 53 production based on the reaction stoichiometry and kinetic equations (i.e., precipitation  
 54 and mass transfer) at each time step. The graphic below illustrates that, as  $C_2H_3O_2^-$  is  
 55 consumed from microbial consumption,  $H_2CO_3$  is produced.

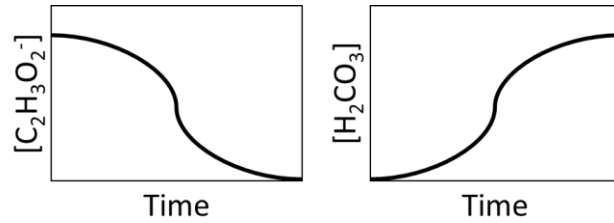

56

57 3. At each time step, the following set of linear equations are solved to determine the  
 58 relative derived concentrations of  $H_2CO_3$ ,  $HCO_3^-$ ,  $CO_3^{2-}$ ,  $H^+$ , and  $OH^-$  from  $H_2CO_3$   
 59 produced in the previous steps. This is done in the ORCHESTRA biochemical module.

60 a. Mass balance equations – the left side of the equation is the total dissolved  
 61 inorganic carbon,  $H_2CO_3$ , from the stoichiometry described in steps 1 and 2. The  
 62 right side are the derived concentrations of species as a result of speciation and  
 63 indicated with italics.

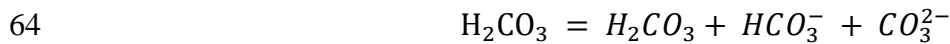

65 b. Electroneutrality – all potentially produced charged species related to this balance  
 66 are considered.

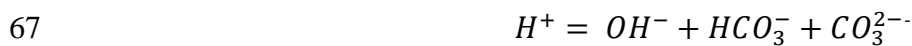

68 c. Acid equilibrium for  $H_2CO_3$

69 
$$K_a = \frac{[CO_3^{2-}][2H^+]}{[H_2CO_3]}$$

70 d. Acid equilibrium for  $HCO_3^-$

71 
$$K_a = \frac{[CO_3^{2-}][H^+]}{[HCO_3^-]}$$

72 e. Water equilibrium

73 
$$K_w = [OH^-][H^+] = 1.0 \cdot 10^{-14}$$

74 4. pH is calculated based on the derived  $H^+$  concentration.

75 While the carbonate system is used here as an example, this stepwise process is used for all acid-  
76 base species and considers the total system set of reactions and species to achieve equilibrium.

77 The total system electroneutrality considered in the model for all considered species is as  
78 follows:

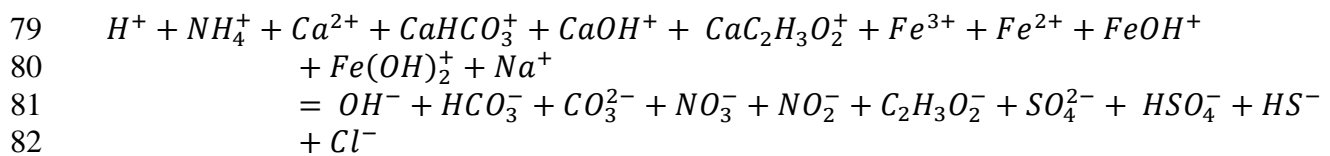

83 These compounds are user defined in the input spreadsheet, but are used within the model by  
84 Orchestra using the Minteq4 chemical database to determine species complexation.

85
